# Chest X-ray image analysis and classification for COVID-19 pneumonia detection using Deep CNN

Terry Gao<sup>1,1</sup>, Grace Wang<sup>2</sup>

<sup>1</sup> Counties Manukau Health, Auckland, 1640, New Zealand

<sup>2</sup> Department of Psychology, School of Public Health and Psychosocial Studies, Auckland University of Technology, 1142, New Zealand

{Terrygao366}@gmail.com, {grace.wang}@aut.ac.nz

**Abstract.** In order to speed up the discovery of COVID-19 disease mechanisms, this research developed a new diagnosis platform using deep convolutional neural network (CNN) which is able to assist radiologists with diagnosis by distinguishing COVID-19 pneumonia from non-COVID-19 pneumonia in patients at Middlemore Hospital based on chest X-rays classification and analysis. Such a tool can save time in interpreting chest X-rays and increase the accuracy and thereby enhance our medical capacity for detection and diagnosis COVID-19. The research idea is that a set of X-ray medical lung images (which include normal, infected by bacteria, infected by virus including COVID-19) were used to train a deep CNN which can be able to distinguish between the noise and the useful information and then uses this training to interpret new images by recognizing patterns that indicate certain diseases such as coronavirus infection in the individual images. The supervised learning method is used as the process of learning from the training dataset can be thought of as a doctor supervising the learning process. It becomes more accurate as the number of analyzed images growing. In this way, it imitates the training for a doctor, but the theory is that since it is capable of learning from a far larger set of images than any human, can have the potential of being more accurate.

**Keywords:** Covid-19, convolutional neural network, deep learning, X-ray, image classification.

## 1 Introduction

Coronaviruses are a large family of viruses that cause illness ranging from the common cold to more severe diseases such as Middle East Respiratory Syndrome (MERS-CoV) and Severe Acute Respiratory Syndrome (SARS-CoV) [1]. This novel

---

<sup>1</sup> Contact Author, on behalf of all authors, the corresponding author states that there is no conflict of interest.

coronavirus (COVID-2019) [2][3][4] is a new strain not previously identified in humans. A common clinical feature of severe COVID-19 infection is pneumonia [5][6][7][8]. Chest X-rays are a useful diagnostic tool for assessing various lung diseases such as pneumonia, but interpretation of the images can be a challenging and time consuming [9] [10].

Part of the challenge is distinguishing between normal tissue and disease processes, a skill that must be learned through experience, particularly for some illnesses such as pneumonia where the difference is less obvious. With more than 1000 patients having chest X-rays taken as part of the diagnostic examination of suspected pneumonia each year at Middlemore Hospital alone, the evaluation of X-rays consumes a considerable amount of resources.

Machine Learning technology is currently being implemented in a variety of different fields including diagnostics and bioinformatics. A Convolutional Neural Network (CNN) is a deep learning algorithm [11] which can be implemented in medical image processing to support correct and speedy decision making [12][13][14][15]. The general idea is that a set of medical images is used to train a deep learning CNN which is able to distinguish between noise and useful diagnostic information [16][17][18][19]. The CNN then uses this training to interpret new images by recognizing patterns that indicate certain diseases in the individual images. In this way, it imitates the training of a doctor, but the theory is that since it is capable of learning from a far larger set of images than any human, the CNN approach has the more accurate results.

A pilot study using publicly available chest X-rays of non-pneumonia patients and patients with coronavirus showed promise in that it is possible to train a CNN be able to distinguish between these two groups with about 90% high accuracy [20]. Though this pilot cannot be translated directly to an actual clinical situation as the analysis is based on digital image processing, and it is possible to train a CNN be able to assist medical staff in distinguishing pneumonia from non-pneumonia patients based on X-rays. In addition, there is the potential to distinguish viral from bacterial pneumonia which is particularly relevant to COVID-19 infection due to the pneumonia being directly associated with the virus, rather than a bacterial complication. The research is that a set of X-ray medical lung images are used to train a deep CNN can be able to distinguish between the noise and the useful information and then uses this training to interpret new images by recognizing patterns that indicate certain diseases such as coronavirus infection in the individual images. The supervised learning method is used as the process of learning from the training dataset can be thought of as a doctor supervising the learning process. It can be more accurate as the number of analyzed images growing. Such a tool could increase the speed and accuracy of interpreting and thereby improve the overall treatment of patients, which is useful for COVID-19 disease detection.

## 2 Design and Methods

If X-rays are used as a means for COVID-19 diagnosis, we need to take into account that diagnostic decisions are made on individuals, not on groups. Due to the limited

health care resources in New Zealand, a fast decision system can help doctors which is able to automatically process individual data and make accurate prediction of possibility for one to develop a particular disease; this requires a fast and personal specific health system, but current system for pneumonia detection primarily relies on human which have reasonable accuracy but with high cost of time and resource. The average time it takes a well-trained radiologist to read a chest X-ray image is about 5-6 minutes. It is hard to speed that up because chest X-ray reading is a very systematic process. Also, to train up enough radiologists for the growing demands within a short period of time is impractical, if not impossible. This research involves some technological breakthroughs, here is where artificial intelligence such as Deep Learning and machine learning methods come into play and help to improve the diagnosis efficiency in New Zealand.

Middlemore Clinical Trials (MMCT) administers commercial clinical trials and major grant-funded research studies on behalf of Middlemore Hospital, and also its partners in clinical trials with biopharmaceutical and medical device companies from across the world. These trials contribute to the delivery of real-world solutions at scale and with speed by providing medical specialists and Counties Manukau patients greater access to better, innovative medicines and new medical devices. With thousands of participants being seen at MMCT since inception in 2001, MMCT is an experienced and respected clinical trial resource.

## **2.1 Study Design and Type**

This research built a diagnostic system which use historical X-rays data collected at Middlemore Hospital and some open-to-public coronavirus infectors' chest X-ray images from [21] for training. The historical data is split into a training and a validation set. The CNN then is trained on the training set and the predictive value of the tool, once trained, and determined by using the validation set. Tests of what parts of the images by which the CNN uses to determine the output is explored to ensure the output is clinically relevant. After this initial analysis, a massive extraction of texture features were applied, and can serve to provide additional information to the diagnosis of COVID-19.

## **2.2 Participants**

The training of the CNN, it needs to have non-pneumonia and pneumonia representing X-rays that are alike in all other aspects that may influence how an X-ray looks, so the deep CNN is trained to look at the actual difference based on the presence of pneumonia and no other factors associated with pneumonia. Since a patient who is diagnosed and treated in-house has at least an X-ray to diagnose the condition and an X-ray to confirm that the pneumonia is gone we have X-rays from the same patient with and without pneumonia. For this reason, the training set is a random selection of patients. The chest X-rays used are the first X-ray taken of the patient during the admission from the moment a pneumonia was suspected, and the

last X-ray taken before discharge. Both X-rays taken used the same position of the patient (standing/lying in bed).

The validity sets include all patients (excluding the ones used for the training set), who were:

- admitted to Middlemore Hospital
- who had an X-ray taken due to suspected pneumonia

Relevant records can be identified from historical data using the above definition of suspected pneumonia. The time interval of the records used is determined by the sample size needed.

### 2.3 Outcomes

For each record in the validation set the following outcomes were collected:

- Diagnosis as determined by the trained CNN
- Gold standard diagnosis, as determined by radiologist and confirmed by discharge ICD10 codes.
  - If an X-ray as been determined not to show pneumonia but discharge ICD10 code shows pneumonia, then at least one other X-ray of that admission episode has to have shown pneumonia and the X-ray cannot be flanked by two X-rays showing pneumonia. If either of these two criteria is not met then the X-ray is determined by showing pneumonia.
  - If an X-ray as been determined to show pneumonia then the discharge ICD10 code has to show pneumonia otherwise it the determined not be showing pneumonia.

### 2.4 Measure or values

For each X-ray we can get the information as below:

- Patient identifier
- Age at time of X-ray (in years)
- Gender
- BMI
- Prioritized ethnicity
- Gold standard diagnosis
- If the X-ray was taken first or last during an episode of pneumonia (only for those with confirmed pneumonia)
- Microbiology results (to confirm if aetiology is viral or bacterial, only for those with confirmed pneumonia)

All measures were obtained retrospectively from already collected data in iPM, e-Vitals, PACS.

## 2.5 Sample size calculations

The training data size depends on the complexity of CNN model, such as the number of inputs/outputs, the relationships between parameters, the noise in the data, the variance and standard deviation of every parameter, so the best approach is to make sure our data covers all the ranges we want for all parameters. Normally, the number of samples at least 10 times more than the number of CNN training parameters, so we initially set the training samples are around 1400 chest X-ray images, which include 400 normal images, 400 pneumonia infected by bacteria images, 400 pneumonia infected by other virus images, 200 pneumonia infected by COVID-19 images. Testing samples are around 400 chest X-ray images (100 images for each class). Around 100 chest X-ray images are used for Validate which also include around 50 COVID-19 infection images. The database includes images different age ranges, sex, and body weight.

## 3 Implementation Procedure

Primary step of this research is a deep CNN was designed and trained to assist radiologists with diagnosis by distinguishing COVID-19 pneumonia from non-COVID-19 pneumonia in patients at Middlemore Hospital with high predictive values using clinically relevant parts of the images. Then this deep CNN is used to distinguish bacterial from viral pneumonia amongst those patients with pneumonia at Middlemore Hospital with high predictive values using clinically relevant parts of the images.

Our research does not need clinical trials or ethic approval, and mainly is based on AI and X-ray images processing, which include the latest machine learning method deep neural networks. The product developed by this research can reduce the workload of doctors and to detect disease at the early stage, so it has precisely customers and scheduled finished as soon as possible. All the data, research output and the product can be shared with other DHB partners and MoH. In the future, we can also use the similar system developed in this research to show signature patterns in other medical image data such as CT, MRI, MEG, et.al. This research can range from lung disease detection to heart disease or cancer detection, which can help to change how we treat early diagnosis.

### 3.1 Training the CNN

The convolution layers have a hierarchical structure and they are core building block of a CNN. Fig. 1 depicts a simple structure of CNN. Deep CNNs applying individual network levels and rapid combination of features takes place before the forecasting stage. The input of first convolution layer is the input space and the output is the feature map. The input and output of next convolutional layers are feature maps of input space. The number of convolutional layers is set by the programmer. The set of feature maps are obtained as the output of convolutional layers. The complex features

of input space are represented by using the stacked hierarchical structure of convolutional layers. The obtained features from the convolutional layers are fed to the pooling layer. An activation function such ReLU is applied to the obtained feature map. In this layer, the relevant features are retained, and the rest are discarded. A dropout layer with a dropout factor of 0.5 has also been used for the regularization of the model. Then the feature maps of the corresponding depths of the contraction path are fed as input. The obtained features are transformed into the one-dimensional array that is called the feature vector. The feature vector is a one-dimensional array and is the input for the fully connected layer. The fully connected layer calculates the output of the CNN.

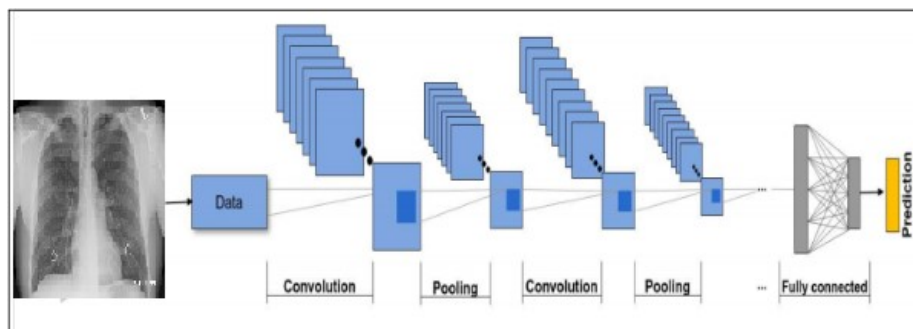

**Fig. 1.** The structure of CNN in this research.

The regression branch predicts the distances from the center of each grid to the four sides of the bounding box. Center-ness is a coefficient in the range of  $[0,1]$  for each grid. The farther the grid center from the object center, the smaller the coefficient is. The center-ness and class are multiplied and then serve as the input of non-maximum suppression (NMS). The Sclera Block is similar to fully convolutional network (FCN), where the input feature map is up sampled by 4 times to obtain a score map. After these operations using the ReLU activation function, the nonlinear transformation of signals is performed for each matrix. The obtained results are sent to the pooling layer. In this layer for each cell, the max (or average) pooling operations are performed. In pooling layer down sampling operation has been done in order to reduce the size of feature matrix derived from convolution layer. After training, the class index is used to measure the class activation map, and the layers can be used when visualizing the class activation map. The CNN gradient model is constructed by supplying the inputs of the pre-trained model and the output of final layer in the network. The average of the gradient values is computed by using connection weights and the ponderation of the filters is computed with respect to the weights, so the connection heatmap can be formed and normalized that all values are set in the range  $[0, 1]$ , and the resulting values can be scaled to the range  $[0, 255]$  to finally show the interested regions with bright color which can be used for medical purpose analysis. Details are as in Table.1.

**Table 1.** The parameters of each level for CNN.

|                      | Layer Type | Output Shape  | Param  |
|----------------------|------------|---------------|--------|
| Input Layer          | Input      | 64 x 64 x 3   | 0      |
| Hidden Layer 1       | Conv1      | 64 x 64 x 32  | 896    |
|                      | ReLU       | 64 x 64 x 32  | 0      |
|                      | Pool1      | 32 x 32 x 32  | 0      |
| Hidden Layer 2       | Conv2      | 32 x 32 x 64  | 18496  |
|                      | ReLU       | 32 x 32 x 64  | 0      |
|                      | Pool2      | 16 x 16 x 64  | 0      |
| Hidden Layer 3       | Conv3      | 16 x 16 x 128 | 73856  |
|                      | ReLU       | 16 x 16 x 128 | 0      |
|                      | Pool3      | 8 x 8 x 128   | 0      |
| Classification layer | Flatten    | 8192          | 0      |
|                      | Dense1     | 16            | 131088 |
|                      | ReLU       | 16            | 0      |
|                      | Dense2     | 64            | 1088   |
|                      | ReLU       | 64            | 0      |
|                      | Dense3     | 128           | 8320   |
|                      | ReLU       | 128           | 0      |
|                      | Dense4     | 2             | 258    |

The first convolutional layer learns 32 convolutional filters, each of input which is 3x3. Then Rectified Linear Units (ReLU) is applied activation function which has output 0 if the input is less than 0, and output otherwise. The following layers use the similar processing. The fully connected layer uses SoftMax for the activation function.

### 3.2 Testing the Deep CNN

Once the CNN has been trained using the training set it is used to diagnose all the X-rays in the test set. For each case, the proportion of each diagnosis can be obtained. The parameters are used to indicate the performance of CNN is as Fig.2 below:

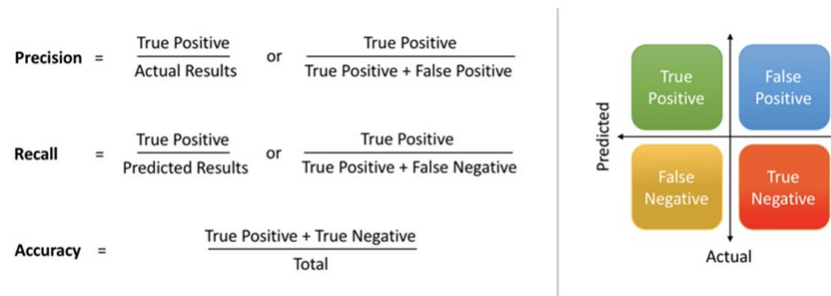

Fig. 2. Accuracy parameters.

### 3.3 Experimental Tests

The testing rules used are as below:

- 1) Positive and predictive values are determined with family wide 95% confidence intervals (Bonferroni correction) for the output of the CNN in determining COVID-19 pneumonia.
- 2) Positive and predictive values are determined with family wide 95% confidence intervals (Bonferroni correction) for the output of the CNN in determining bacterial against viral pneumonia.
- 3) Logistic regression were used to determine whether the performance of the CNN is associated (has significant interaction term) with age, gender, BMI and ethnicity.

An example of the type of X-ray data that is analyzed using our CNN approach is shown in Figure 1. The test image is from “The New England Journal of Medicine, 2020: January 31. DOI: 10.1056/ NEJMoA 2001191”. [22]. Data augmentation methods applied in the proposed CNN are scale, shift, rotate, salt and pepper noise, and flip. By applying these small transformations to images during training, variety in the training dataset has been created and improves the robustness of the proposed model. Generators had been implemented for dynamic augmentation of input image and generation of corresponding ground truth labels.

The experiment and software are based on the TensorFlow 2.1-GPU, Python 3.7 and CUDA 10.1 for accelerated training. The hardware for this system includes two i7-CPUs, 16.0GB memory, and a 500 GB SSD drive, NVIDIA GeForce GTX 1660 Ti GPU, and it takes about 4 hours of training to converge.

User interface of the system developed by this research is shown as Fig.3 and Fig.4.



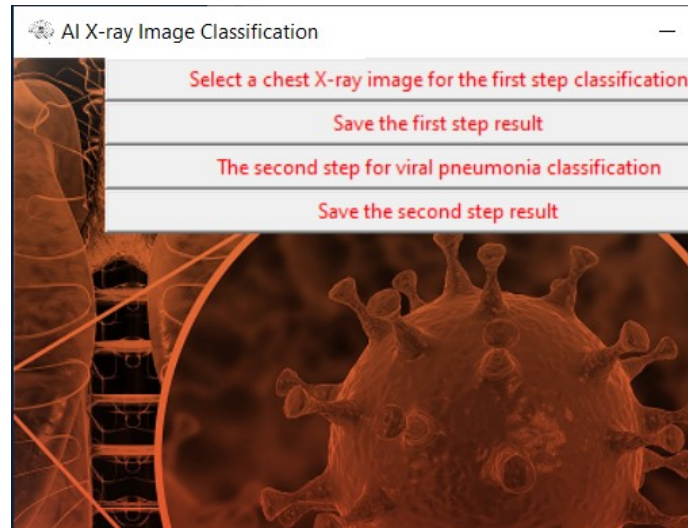

**Fig. 3.** User Interface (UI) of the system

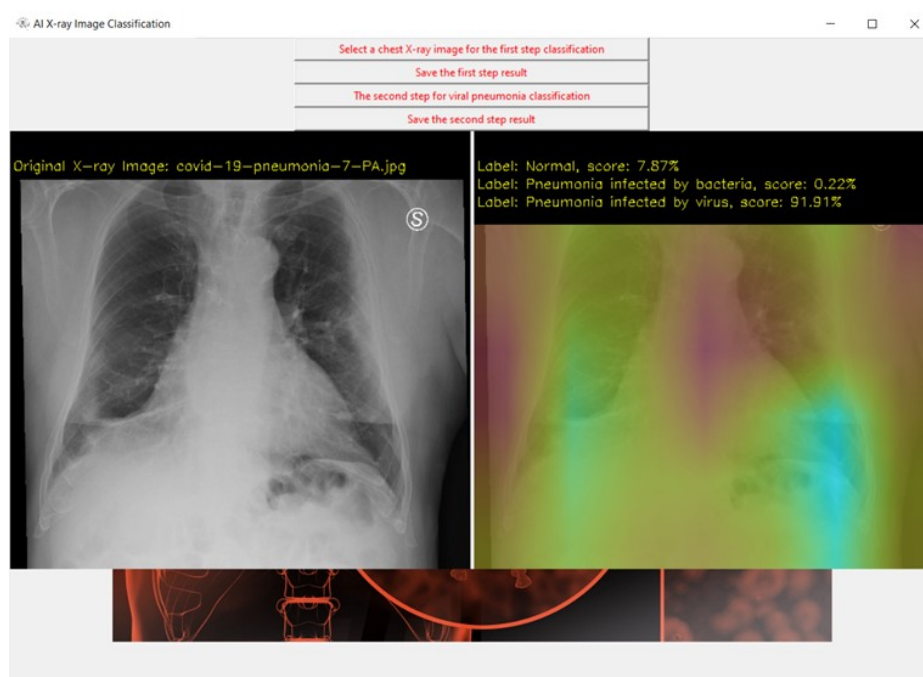

a) Results from step.1. Left image shows the original X-ray data, Right image shows the possibility of 3 different cases (normal, infected by bacteria, infected by virus) and brighter color shows which part has the potential infection problem.

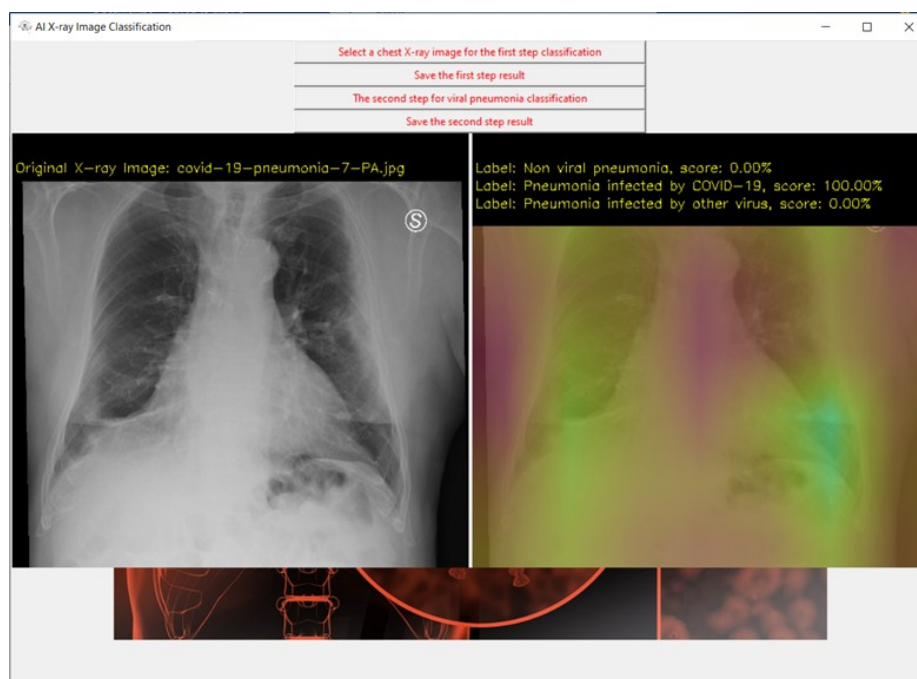

b) Results from step.2. If detection of step.1 shows viral pneumonia with the highest score, continue processes are analysis and checking if the patient has COVID-19 infection or not. Right image shows the possibility of 3 different cases (non-viral pneumonia, infected by COVID-19, infected by other virus) and brighter color shows which part has the potential infection problem.

**Fig. 4.** Analysis Results Demo

The architecture of CNN categorizes for benefits in X-ray medical imaging such as number of modules in interconnected operations and input modalities, dimension in input patch, quantity of time predictions and contextual information about implicit and explicit. The test results of CNN proposed are shown as Fig.5 and Fig.6.

|                                    | precision | recall | f1-score | support |
|------------------------------------|-----------|--------|----------|---------|
| Normal                             | 0.95      | 0.89   | 0.92     | 62      |
| Pneumonia infected by bacteria     | 1.00      | 0.83   | 0.91     | 6       |
| Pneumonia infected by COVID-19     | 0.91      | 1.00   | 0.95     | 61      |
| Pneumonia infected by normal virus | 0.85      | 0.82   | 0.84     | 34      |
| accuracy                           |           |        | 0.91     | 163     |
| macro avg                          | 0.93      | 0.89   | 0.90     | 163     |
| weighted avg                       | 0.92      | 0.91   | 0.91     | 163     |

**Fig. 5.** Test results

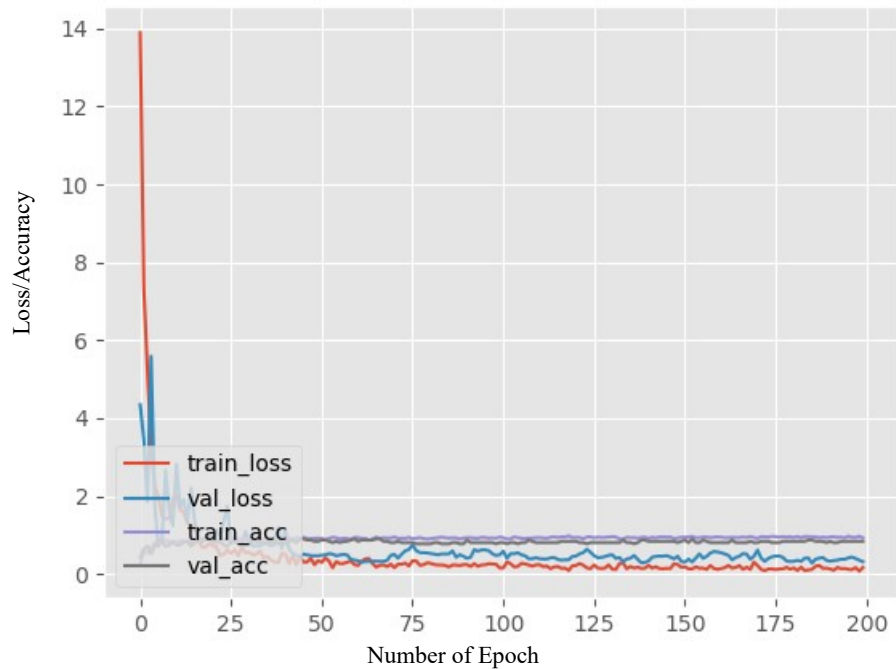

**Fig. 6.** Loss and Accuracy

## 4 Conclusions

X-ray images play an important role in the diagnosis of COVID-19 infection from other pneumonia as an advanced imaging evidence. Artificial Intelligence (AI) algorithms and radionic features derived from chest X-rays can be of huge help to undertake massive screening programs that could take place in any hospital with access to X-ray equipment and aid in the diagnosis of COVID-19, as all the process can be done automatically, the cost is significant decreased compared with traditional method. In order to speed up the discovery of disease mechanisms, this research developed a deep CNN based chest X-ray classifier to detect abnormalities and extract textural features of the altered lung parenchyma that can be related to specific signatures of the COVID-19 virus. In this way, it imitates the training for a doctor, but the theory is that since it is capable of learning from a far larger set of images than any human, it has the advantages of being more accurate and reducing the diagnosing time.

## Conflict of Interest

On behalf of all authors, the corresponding author states that there is no conflict of interest, and this article does not contain any studies with human participants performed by any of the authors. We only use the historical data and X-ray images. Patient NHI were used to join data together and were removed once data quality checks have been performed. There is no interaction with or impact on patients. The data is kept on a secure CM Health server, in folders only accessible to staff directly related to this research study with password protection.

## References

- [1] Wang D, Hu B, Hu C, et al. Clinical Characteristics of 138 Hospitalized Patients With 2019 Novel Coronavirus–Infected Pneumonia in Wuhan, China. *JAMA*. Published online February 07, 2020. doi:10.1001/jama.2020.1585.
- [2] Aboughdir, M., et al. "Prognostic value of cardiovascular biomarkers in COVID-19: A review." *Viruses* 12(5) DOI: 10.3390/v12050527, 2020.
- [3] Acharya, A., et al. "SARS-CoV-2 Infection Leads to Neurological Dysfunction." *Journal of neuroimmune pharmacology: the official journal of the Society on NeuroImmune Pharmacology* DOI: <https://dx.doi.org/10.1007/s11481-020-09924-9>, 2020.
- [4] Kiran, G., et al. "In Silico Computational Screening of Kabasura Kudineer - Official Siddha Formulation and JACOM against SARS-CoV-2 Spike protein." *Journal of Ayurveda and Integrative Medicine* DOI: <https://doi.org/10.1016/j.jaim.2020.05.009> 2020/05/25/.
- [5] Ackermann, M., et al. "Pulmonary Vascular Endothelialitis, Thrombosis, and Angiogenesis in Covid-19." *The New England journal of medicine* DOI: <https://dx.doi.org/10.1056/NEJMoa2015432>, 2020.
- [6] Cao, Y., et al. "Potent neutralizing antibodies against SARS-CoV-2 identified by high-throughput single-cell sequencing of convalescent patients' B cells." *Cell* DOI: <https://dx.doi.org/10.1016/j.cell.2020.05.025>, 2020.
- [7] Addeo, A., et al. "COVID-19 and lung cancer: risks, mechanisms and treatment interactions." *Journal for Immunotherapy of Cancer* 8(1) DOI: <https://dx.doi.org/10.1136/jitc-2020-000892>, 2020.
- [8] Agarwal, A., et al. "Guidance for building a dedicated health facility to contain the spread of the 2019 novel coronavirus outbreak." *Indian Journal of Medical Research* 151(2): 177-183 DOI: 10.4103/ijmr.IJMR\_518\_20, 2020.
- [9] Yousif Mohamed Y. Abdallah and Tariq Alqahtani. *Research in Medical Imaging Using Image Processing Techniques, Medical Imaging - Principles and Applications*, Yongxia Zhou, IntechOpen, DOI: 10.5772/intechopen.84360. June 24th, 2019.

- [10] Taghizadieh A, Ala A, Rahmani F, Nadi A. Diagnostic Accuracy of Chest X-Ray and Ultrasonography in Detection of Community Acquired Pneumonia; a Brief Report. *Emerg (Tehran)*. 2015;3(3):114–116.
- [11] Wachinger, C., Reuter, M., & Klein, T. DeepNAT: Deep convolutional neural network for segmenting neuroanatomy. *Neuroimage*, 170, 434-445. doi: 10.1016/j.neuroimage.2017.02.035.
- [12] Dua,S.U.R, Acharya & P.Dua, *Machine learning in Healthcare informatics*, 2014.
- [13] A.Fourcade, R.H.Khonsari. Deep learning in medical image analysis: A third eye for doctors, *Journal of Stomatology, Oral and Maxillofacial Surgery*, Volume 120, Issue 4, Pages 279-288, September 2019.
- [14] Li, J., Feng, J., & Kuo, C. Deep convolutional neural network for latent fingerprint enhancement. *Signal Processing: Image Communication*, 60, 52-63. doi: 10.1016/j.image.2017.08.010, 2017.
- [15] Hussain, S., Anwar, S., & Majid, M. Segmentation of glioma tumors in brain using deep convolutional neural network. *Neurocomputing*, 282, 248-261. doi: 10.1016/j.neucom.2017.12.032, 2017.
- [16] Baldominos, A., Saez, Y., & Isasi, P. Evolutionary convolutional neural networks: An application to handwriting recognition. *Neurocomputing*, 283, 38-52. doi: 10.1016/j.neucom.2017.12.049, 2017.
- [17] Ferreira, A., & Giraldi, G. Convolutional Neural Network approaches to granite tiles classification. *Expert Systems with Applications*, 84, 1-11. doi: 10.1016/j.eswa.2017.04.053, 2017.
- [18] Liu, N., Han, J., Liu, T., & Li, X. Learning to Predict Eye Fixations via Multiresolution Convolutional Neural Networks. *IEEE Transactions on Neural Networks And Learning Systems*, 29(2), 392-404. doi: 10.1109/tnnls.2016.2628878, 2018.
- [19] Salvati, D., Drioli, C., & Foresti, G. Exploiting CNNs for Improving Acoustic Source Localization in Noisy and Reverberant Conditions. *IEEE Transactions on Emerging Topics In Computational Intelligence*, 2(2), 103-116. doi: 10.1109/tetci.2017.2775237, 2018
- [20] Jeffrey P. Kanne, Brent P. Little, Jonathan H. Chung, Brett M. Elicker, Loren H. Ketai, *Essentials for Radiologists on COVID-19: An Update-Radiology Scientific Expert Panel*, *Radiology*, 2020, <https://doi.org/10.1148/radiol.2020200527>
- [21] <https://www.kaggle.com/paultimothymooney/chest-xray-pneumonia>
- [22] Michelle L. Holshue, Chas DeBolt, et al. First Case of 2019 Novel Coronavirus in the United States. *The New England Journal of Medicine*, 2020: January 31. DOI: 10.1056/NEJMoa2001191.

## **Appendix: Social Benefits**

### **Responsiveness to Māori**

As a District Health Board, Counties Manukau Health serve one of the largest and most diverse Māori populations in the country. Achieving Māori health equity is a key priority for us. We aim to see Maori living longer, healthier lives with whanau and in their communities. This research aims to provide access to our AI technology to find new diagnostic tools and ways to understand the mechanisms and aggressiveness of the COVID-19 disease, contributing to the efforts to find a cure. Any Maori people can get the free diagnosis results for using of the deep CNN based chest X-ray classification tool available in Middlemore Hospital cloud platform. This research tool can also be offered through online system to any doctor countrywide with the need of analyzing chest X-rays with suspicion of COVID-19 for Maori people.

### **Dissemination of results and knowledge transfer**

1. Share the technology and data with Auckland DHB, Waitemata DHB and other NZ Health Partners in New Zealand.
2. We use these deep learning techniques to build the early diagnosis system for the detection of lung pneumonia diseases by X-ray images. In the future, we can also use the similar system to show signature patterns in other medical image data such as CT, MRI, MEG, et.al. This research can range from lung disease detection to heart disease or cancer detection, which can help to reduce the workload of doctors and to detect disease at the early stage; also, it could even change how we treat early diagnosis.
